# Supplementary material for: The metabolic stress response: Adaptation to acute-, repeated- and chronic challenges in mice
Source: PubMed Central journal article supplement — iScience. 2022 Jun 30;25(8):104693. doi: 10.1016/j.isci.2022.104693 (PMC9307515; doi:10.1016/j.isci.2022.104693), 2022-06-30
Supplement: mmc1.pdf [file mmc1.pdf]

iScience, Volume 25

## **Supplemental information**

### **The metabolic stress response: Adaptation to acute-, repeated- and chronic challenges in mice**

**Dániel Kuti, Zsuzsanna Winkler, Krisztina Horváth, Balázs Juhász, Anett Szilvásszabó, Csaba Fekete, Szilamér Ferenczi, and Krisztina J. Kovács**

**Table S1: Chronic variable stress (CVS) protocol**

Related to STAR Methods.

| CVS protocol |                                      |                                               |
|--------------|--------------------------------------|-----------------------------------------------|
| <b>day</b>   | <b>a.m.</b>                          | <b>p.m.</b>                                   |
| 1.day        | water avoidance (1h)                 | overnight light (12h)                         |
| 2.day        | social defeat (5min)                 | footshock (12min)                             |
| 3.day        | forced swimming (5min)               | soaked bedding+slanted cages (4h)             |
| 4.day        | crowding+shaking (30min)             | crowding (30min)                              |
| 5.day        | restraint (30min)                    | isolation (12h)                               |
| 6.day        | social defeat (5min)                 | forced swimming (5min)                        |
| 7.day        | footshock (12min)                    | soaked bedding+slanted cages (4h)             |
| 8.day        | forced swimming (5min)               | footshock (12min)                             |
| 9.day        | water avoidance (1h)                 | overnight light (12h)                         |
| 10.day       | social defeat (5min)                 | footshock (12min)                             |
| 11.day       | isolation+rat feces odor (4h)        | isolation+rat feces odor+dark (4h)            |
| 12.day       | crowding+shaking (30min)             | crowding+soaked bedding+slanted cages (30min) |
| 13.day       | forced swimming (5min)               | forced swimming (5min)                        |
| 14.day       | crowding+shaking (30min)             | restraint (30min)                             |
| 15.day       | rat feces odor+dark (4h)             | social defeat (5min)                          |
| 16.day       | rat feces odor (4h)                  | footshock (12min)                             |
| 17.day       | forced swimming (5min)               | restraint (30min)                             |
| 18.day       | social defeat (5min)                 | rat feces odor+dark (4h)                      |
| 19.day       | water avoidance (1h)                 | footshock (12min)                             |
| 20.day       | dark for (4h)                        | restraint (30min)                             |
| 21.day       | soaked bedding+slanted cages (30min) | rat feces odor (4h)                           |
